# Supplementary material for: Avoid equipment graveyards: rigorous process to improve identification and procurement of effective, affordable, and usable newborn devices in low-resource hospital settings
Source: Springer Nature journal article supplement (doi:10.1186/s12887-023-04362-x), 2023-11-15
Supplement: MOESM5 [file 26308066]

Optimal Minimal Does not meet minimal Unknown

**Bilirubinometer**

Evaluated against Target Product Profile (TPP) as reported by manufacturer

| TPP Characteristic                                   | Optimal Requirement                                                                                                                                                                                        | Minimal Requirement                                                                                                                                                                             | A            | B   | C   | D  | E  | F  | G  | H  | I  | J  | K  | L  |
|------------------------------------------------------|------------------------------------------------------------------------------------------------------------------------------------------------------------------------------------------------------------|-------------------------------------------------------------------------------------------------------------------------------------------------------------------------------------------------|--------------|-----|-----|----|----|----|----|----|----|----|----|----|
| Intended Use                                         | Quantification of serum bilirubin in neonates for the diagnosis and management of jaundice at the patient's bedside                                                                                        |                                                                                                                                                                                                 |              |     |     |    |    |    |    |    |    |    |    |    |
| Target Operator                                      | For use in low and middle income countries by a wide variety of clinicians, including nurses, clinical officers, and pediatricians                                                                         |                                                                                                                                                                                                 |              |     |     |    |    |    |    |    |    |    |    |    |
| Target Population                                    | Neonates (born at any gestational age and require ongoing care)                                                                                                                                            |                                                                                                                                                                                                 |              |     |     |    |    |    |    |    |    |    |    |    |
| Target Setting                                       | Hospitals in low-resource settings                                                                                                                                                                         |                                                                                                                                                                                                 |              |     |     |    |    |    |    |    |    |    |    |    |
| Quality Management                                   | ISO 13485:2016 medical devices - Quality management systems -- Requirements for regulatory purposes                                                                                                        |                                                                                                                                                                                                 |              |     |     |    |    |    |    |    |    |    |    |    |
| Regulation                                           | At least one of: CE marking, approved by US FDA or another stringent regulatory body of a founding member of IMDRF (e.g., Japan or Australia or Canada)                                                    |                                                                                                                                                                                                 |              |     |     |    |    |    |    |    |    |    |    |    |
| Linear Range                                         | 0-40 mg/dL (0-684 umol/L)                                                                                                                                                                                  | 5-30 mg/dL (85.5 - 513 umol/L)                                                                                                                                                                  |              |     |     |    |    |    |    |    |    |    |    |    |
| Accuracy                                             | +/- 10% from 5-30mg/dL                                                                                                                                                                                     | +/- 20% from 5-30mg/dL                                                                                                                                                                          |              |     |     |    |    |    |    |    |    |    |    |    |
| Results Format                                       | Quantitative across whole linear range                                                                                                                                                                     |                                                                                                                                                                                                 |              |     |     |    |    |    |    |    |    |    |    |    |
| Results Units                                        | Must display mg/dL and umol/L (shall have ability to select or switch between either)                                                                                                                      |                                                                                                                                                                                                 |              |     |     |    |    |    |    |    |    |    |    |    |
| Precision                                            | 4% CV                                                                                                                                                                                                      | 15% CV                                                                                                                                                                                          |              |     |     |    |    |    |    |    |    |    |    |    |
| Sample                                               | Whole blood heel-stick sample <50ul; does not require user to separate serum/plasma using a centrifuge                                                                                                     |                                                                                                                                                                                                 |              |     |     |    |    |    |    |    |    |    |    |    |
| Calibration                                          | No Calibration                                                                                                                                                                                             | Minimal user calibration required                                                                                                                                                               |              |     |     |    |    |    |    |    |    |    |    |    |
| Kit Stability & Storage                              | Stable for >12 months with harsh ambient conditions (temperature 5-45 °C, humidity 15% to 95%, dusty air, elevation >=2000 meters) and transport stress (48h with fluctuations up to 50°C and down to 0°C) | Stable for 12 months with harsh ambient conditions (temperature 10-40 °C, humidity 15%-95% elevation up to 2000 meters) and transport stress (48h with fluctuations up to 50°C and down to 0°C) |              |     |     |    |    |    |    |    |    |    |    |    |
| Equipment Required                                   | Small, portable or hand-held device; device-free/disposable preferred; does not require centrifuge                                                                                                         | Small, table-top device; portable device optional; does not require centrifuge                                                                                                                  |              |     |     |    |    |    |    |    |    |    |    |    |
| Instrument Pricing                                   | < \$200 ex-works                                                                                                                                                                                           | <\$800 ex-works                                                                                                                                                                                 |              |     |     |    |    |    |    |    |    |    |    |    |
| Consumable Pricing                                   | <\$0.50 per test ex-works                                                                                                                                                                                  | \$1.50 per test ex-works                                                                                                                                                                        |              |     |     |    |    |    |    |    |    |    |    |    |
| Power Source                                         | No power required                                                                                                                                                                                          | Mains with rechargeable battery                                                                                                                                                                 |              |     |     |    |    |    |    |    |    |    |    |    |
| Battery                                              | None (i.e. a disposable test that requires no electricity)                                                                                                                                                 | Rechargeable battery >100 tests on a single charge.                                                                                                                                             |              |     |     |    |    |    |    |    |    |    |    |    |
| Voltage                                              | None                                                                                                                                                                                                       | Model must match the voltage and frequency of the purchasing country's local power grid (e.g., 110-120 VAC at 60 Hz or 220-240 VAC at 50 Hz)                                                    |              |     |     |    |    |    |    |    |    |    |    |    |
| Purchased for evaluations?                           |                                                                                                                                                                                                            |                                                                                                                                                                                                 | Yes          | Yes | Yes | No | No | No | No | No | No | No | No | No |
| Technical                                            | Does device meet all minimal performance characteristics from TPP?                                                                                                                                         | Verified by lab evaluations on n = 2 devices by 3 unique users                                                                                                                                  |              |     |     |    |    |    |    |    |    |    |    |    |
| Environmental                                        | Is device rugged, durable, easy to maintain and repair?                                                                                                                                                    | Heat                                                                                                                                                                                            |              |     |     |    |    |    |    |    |    |    |    |    |
|                                                      |                                                                                                                                                                                                            | Humidity                                                                                                                                                                                        |              |     |     |    |    |    |    |    |    |    |    |    |
|                                                      |                                                                                                                                                                                                            | Dust                                                                                                                                                                                            | Did not test |     |     |    |    |    |    |    |    |    |    |    |
|                                                      |                                                                                                                                                                                                            | Power                                                                                                                                                                                           |              |     |     |    |    |    |    |    |    |    |    |    |
| Usability                                            | Can doctors and nurses use the device with minimal training?                                                                                                                                               | Heuristic evaluation                                                                                                                                                                            |              |     |     |    |    |    |    |    |    |    |    |    |
|                                                      |                                                                                                                                                                                                            | Houston task effectiveness (Measure)                                                                                                                                                            | 83%          | 33% | 66% |    |    |    |    |    |    |    |    |    |
|                                                      |                                                                                                                                                                                                            | Houston task effectiveness (Calibrate)                                                                                                                                                          | N/A          | 83% | 83% |    |    |    |    |    |    |    |    |    |
|                                                      |                                                                                                                                                                                                            | Houston SUS <50 50-70 >70                                                                                                                                                                       | 87           | 60  | 63  |    |    |    |    |    |    |    |    |    |
|                                                      |                                                                                                                                                                                                            | Fraction of Houston users indicating preferred device                                                                                                                                           | 100%         | 0%  | 0%  |    |    |    |    |    |    |    |    |    |
|                                                      |                                                                                                                                                                                                            | Malawi task effectiveness (Measure)                                                                                                                                                             | 80%          | 60% | 20% |    |    |    |    |    |    |    |    |    |
|                                                      |                                                                                                                                                                                                            | Malawi task effectiveness (Calibrate)                                                                                                                                                           | N/A          | 40% | 40% |    |    |    |    |    |    |    |    |    |
|                                                      |                                                                                                                                                                                                            | Malawi SUS <50 50-70 >70                                                                                                                                                                        | 95           | 76  | 48  |    |    |    |    |    |    |    |    |    |
| Fraction of Malawi users indicating preferred device | 80%                                                                                                                                                                                                        | 20%                                                                                                                                                                                             | 0%           |     |     |    |    |    |    |    |    |    |    |    |
| NEST Qualified Technology?                           |                                                                                                                                                                                                            |                                                                                                                                                                                                 | Yes          | Yes | No  | No | No | No | No | No | No | No | No |    |

Did not meet required specifications when evaluated against the TPP

Optimal Minimal Does not meet minimal Unknown

**Phototherapy**

Evaluated against Target Product Profile (TPP) as reported by manufacturer

| TPP Characteristic         | Optimal Requirement                                                                                                                                                                                       | Minimal Requirement                                             | A    | B    | C          | D  | E  | F  | G  | H  | I  | J  | K  | L  | M  | N  | O  | P  | Q  |
|----------------------------|-----------------------------------------------------------------------------------------------------------------------------------------------------------------------------------------------------------|-----------------------------------------------------------------|------|------|------------|----|----|----|----|----|----|----|----|----|----|----|----|----|----|
| Intended Use               | Treatment of hyperbilirubinemia in neonates                                                                                                                                                               |                                                                 |      |      |            |    |    |    |    |    |    |    |    |    |    |    |    |    |    |
| Target Operator            | For use in low- and middle-income countries by a wide variety of clinicians, including nurses, clinical officers, and pediatricians                                                                       |                                                                 |      |      |            |    |    |    |    |    |    |    |    |    |    |    |    |    |    |
| Target Population          | Neonates (born at any gestational age and require ongoing care)                                                                                                                                           |                                                                 |      |      |            |    |    |    |    |    |    |    |    |    |    |    |    |    |    |
| Target Setting             | Hospitals in low-resource settings                                                                                                                                                                        |                                                                 |      |      |            |    |    |    |    |    |    |    |    |    |    |    |    |    |    |
| Quality Management         | ISO 13485:2016 Medical devices - Quality management systems                                                                                                                                               |                                                                 |      |      |            |    |    |    |    |    |    |    |    |    |    |    |    |    |    |
| Regulation                 | At least one of: CE marking, approved by US FDA or another stringent regulatory body of a founding member of IMDRF (e.g., Japan or Australia or Canada)                                                   |                                                                 |      |      |            |    |    |    |    |    |    |    |    |    |    |    |    |    |    |
| Irradiance                 | Standard Phototherapy: 8-10 AND Intensive Phototherapy: >30 uW/cm2/nm                                                                                                                                     |                                                                 |      |      |            |    |    |    |    |    |    |    |    |    |    |    |    |    |    |
| Effective treatment area   | >2000 cm2                                                                                                                                                                                                 | >1300 cm2                                                       |      |      |            |    |    |    |    |    |    |    |    |    |    |    |    |    |    |
| Peak wavelength            | 430-490 nm                                                                                                                                                                                                |                                                                 |      |      |            |    |    |    |    |    |    |    |    |    |    |    |    |    |    |
| Light Source               | LED                                                                                                                                                                                                       |                                                                 |      |      |            |    |    |    |    |    |    |    |    |    |    |    |    |    |    |
| Bulb Lifetime              | 60,000 hours                                                                                                                                                                                              | 44,000 hours                                                    |      |      |            |    |    |    |    |    |    |    |    |    |    |    |    |    |    |
| Ease of Replacing Bulbs    | Capable of being replaced by a technician with minimal training and basic tools (screwdrivers)                                                                                                            |                                                                 |      |      |            |    |    |    |    |    |    |    |    |    |    |    |    |    |    |
| Irradiance Meter           | Included                                                                                                                                                                                                  | Available                                                       |      |      |            |    |    |    |    |    |    |    |    |    |    |    |    |    |    |
| Instrument Pricing         | < \$400 ex-works                                                                                                                                                                                          | < \$1000 ex-works                                               |      |      |            |    |    |    |    |    |    |    |    |    |    |    |    |    |    |
| Power Source               | Mains with battery backup                                                                                                                                                                                 | Mains power                                                     |      |      |            |    |    |    |    |    |    |    |    |    |    |    |    |    |    |
| Battery                    | Provides battery backup                                                                                                                                                                                   |                                                                 |      |      |            |    |    |    |    |    |    |    |    |    |    |    |    |    |    |
| Voltage                    | Model must match the voltage and frequency of the purchasing country's local power grid (e.g., 110-120 VAC at 60 Hz or 220-240 VAC at 50 Hz)                                                              |                                                                 |      |      |            |    |    |    |    |    |    |    |    |    |    |    |    |    |    |
| User instructions          | User manual and additional training materials (checklists, videos, guides) in at least one national language for the country of intended use. Attached to device with labels and markings where possible. | User manual provided in at least one national official language |      |      |            |    |    |    |    |    |    |    |    |    |    |    |    |    |    |
| Warranty                   | 5 years                                                                                                                                                                                                   | 1 year                                                          |      |      |            |    |    |    |    |    |    |    |    |    |    |    |    |    |    |
| Purchased for evaluations? |                                                                                                                                                                                                           |                                                                 | Yes  | Yes  | Yes        | No | No | No | No | No | No | No | No | No | No | No | No | No | No |
| Technical                  | Does device meet all minimal performance characteristics from TPP?                                                                                                                                        | Verified by lab evaluations on n=2 devices by 3 users           |      |      |            |    |    |    |    |    |    |    |    |    |    |    |    |    |    |
| Environmental              | Is device rugged, durable, easy to maintain and repair?                                                                                                                                                   | Heat                                                            |      |      |            |    |    |    |    |    |    |    |    |    |    |    |    |    |    |
|                            |                                                                                                                                                                                                           | Humidity                                                        |      |      |            |    |    |    |    |    |    |    |    |    |    |    |    |    |    |
|                            |                                                                                                                                                                                                           | Dust                                                            |      |      |            |    |    |    |    |    |    |    |    |    |    |    |    |    |    |
|                            |                                                                                                                                                                                                           | Power                                                           |      |      |            |    |    |    |    |    |    |    |    |    |    |    |    |    |    |
| Usability                  | Can doctors and nurses use the device with minimal training?                                                                                                                                              | Heuristic evaluation                                            | Pass | Pass | Pass       |    |    |    |    |    |    |    |    |    |    |    |    |    |    |
|                            |                                                                                                                                                                                                           | Houston task effectiveness (setup & use in high-intensity mode) | 100% | 100% | 100%       |    |    |    |    |    |    |    |    |    |    |    |    |    |    |
|                            |                                                                                                                                                                                                           | Houston SUS <50 50-70 >70                                       | 87   | 93   | 97         |    |    |    |    |    |    |    |    |    |    |    |    |    |    |
|                            |                                                                                                                                                                                                           | Fraction of Houston users indicating preferred device           | 25%  | 25%  | 50%        |    |    |    |    |    |    |    |    |    |    |    |    |    |    |
|                            |                                                                                                                                                                                                           | Malawi task effectiveness (setup & use in high-intensity mode)  | 83%  | 75%  | not tested |    |    |    |    |    |    |    |    |    |    |    |    |    |    |
|                            |                                                                                                                                                                                                           | Malawi SUS <50 50-70 >70                                        | 79   | 83   | not tested |    |    |    |    |    |    |    |    |    |    |    |    |    |    |
|                            |                                                                                                                                                                                                           | Fraction of Malawi users indicating preferred device            | 42%  | 58%  | 0%         |    |    |    |    |    |    |    |    |    |    |    |    |    |    |
| Qualified Technology?      |                                                                                                                                                                                                           |                                                                 | Yes  | Yes  | Yes        | No | No | No | No | No | No | No | No | No | No | No | No | No |    |

Did not meet required specifications when evaluated against the TPP





Optimal Minimal Does not meet minimal Unknown

CPAP

Evaluated against Target Product Profile (TPP) as reported by manufacturer

| TPP Characteristic         | Optimal Requirement                                                                                                                                                                                       | Minimal Requirement                                             | A    | B    | C                     | D   | E  | F  | G  | H  | I  | J  | K  | L  | M  | N  | O  | P  | Q  | R  |  |  |
|----------------------------|-----------------------------------------------------------------------------------------------------------------------------------------------------------------------------------------------------------|-----------------------------------------------------------------|------|------|-----------------------|-----|----|----|----|----|----|----|----|----|----|----|----|----|----|----|--|--|
| Intended Use               | To treat respiratory distress and other forms of respiratory illness in infants up to one year of age                                                                                                     |                                                                 |      |      |                       |     |    |    |    |    |    |    |    |    |    |    |    |    |    |    |  |  |
| Target Operator            | For use in low- and middle-income countries by a wide variety of clinicians, including nurses, clinical officers, and pediatricians                                                                       |                                                                 |      |      |                       |     |    |    |    |    |    |    |    |    |    |    |    |    |    |    |  |  |
| Target Population          | Neonates (born at any gestational age and require ongoing care)                                                                                                                                           |                                                                 |      |      |                       |     |    |    |    |    |    |    |    |    |    |    |    |    |    |    |  |  |
| Target Setting             | Hospitals in low-resource settings                                                                                                                                                                        |                                                                 |      |      |                       |     |    |    |    |    |    |    |    |    |    |    |    |    |    |    |  |  |
| Quality Management         | ISO 13485:2016 Medical devices - Quality management systems                                                                                                                                               |                                                                 |      |      |                       |     |    |    |    |    |    |    |    |    |    |    |    |    |    |    |  |  |
| Regulation                 | At least one of: CE marking, approved by US FDA or another stringent regulatory body of a founding member of IMDRF (e.g., Japan or Australia or Canada)                                                   |                                                                 |      |      |                       |     |    |    |    |    |    |    |    |    |    |    |    |    |    |    |  |  |
| Flow driver                | Integrated (on-board air compressor)                                                                                                                                                                      |                                                                 |      |      |                       |     |    |    |    |    |    |    |    |    |    |    |    |    |    |    |  |  |
| Oxygen Flow Capacity       | 0-10 L/min                                                                                                                                                                                                |                                                                 |      |      |                       |     |    |    |    |    |    |    |    |    |    |    |    |    |    |    |  |  |
| Pressure                   | 5-8 cm H2O                                                                                                                                                                                                |                                                                 |      |      |                       |     |    |    |    |    |    |    |    |    |    |    |    |    |    |    |  |  |
| Total (blended) Flow       | 0-10 L/min                                                                                                                                                                                                |                                                                 |      |      |                       |     |    |    |    |    |    |    |    |    |    |    |    |    |    |    |  |  |
| Humidification             | Yes, Heated Humidification                                                                                                                                                                                | None                                                            |      |      |                       |     |    |    |    |    |    |    |    |    |    |    |    |    |    |    |  |  |
| Alarms                     | Audio/Visual Power, low-flow, low-pressure                                                                                                                                                                | Audio Power                                                     |      |      |                       |     |    |    |    |    |    |    |    |    |    |    |    |    |    |    |  |  |
| Accessories                | Non-proprietary                                                                                                                                                                                           | Proprietary                                                     |      |      |                       |     |    |    |    |    |    |    |    |    |    |    |    |    |    |    |  |  |
| Consumables                | Reusable                                                                                                                                                                                                  | Available                                                       |      |      |                       |     |    |    |    |    |    |    |    |    |    |    |    |    |    |    |  |  |
| Instrument Pricing         | <\$1,000 ex-works                                                                                                                                                                                         | <\$2,000 ex-works                                               |      |      |                       |     |    |    |    |    |    |    |    |    |    |    |    |    |    |    |  |  |
| Consumable Pricing         | <\$10 / patient ex-works                                                                                                                                                                                  | <\$15 per patient ex-works                                      |      |      |                       |     |    |    |    |    |    |    |    |    |    |    |    |    |    |    |  |  |
| Power Source               | Mains with battery backup                                                                                                                                                                                 | Mains Power                                                     |      |      |                       |     |    |    |    |    |    |    |    |    |    |    |    |    |    |    |  |  |
| Battery                    | Rechargeable integrated battery, >6 hours on a single charge                                                                                                                                              | None                                                            |      |      |                       |     |    |    |    |    |    |    |    |    |    |    |    |    |    |    |  |  |
| Voltage                    | Model must match the voltage and frequency of the purchasing country's local power grid (e.g., 110-120 VAC at 60 Hz or 220-240 VAC at 50 Hz)                                                              |                                                                 |      |      |                       |     |    |    |    |    |    |    |    |    |    |    |    |    |    |    |  |  |
| User Instructions          | User manual and additional training materials (checklists, videos, guides) in at least one national language for the country of intended use. Attached to device with labels and markings where possible. | User manual provided in at least one national official language |      |      |                       |     |    |    |    |    |    |    |    |    |    |    |    |    |    |    |  |  |
| Warranty                   | 5 years                                                                                                                                                                                                   | 1 year                                                          |      |      |                       |     |    |    |    |    |    |    |    |    |    |    |    |    |    |    |  |  |
| Purchased for evaluations? |                                                                                                                                                                                                           |                                                                 | Yes  | Yes  | Yes                   | No  | No | No | No | No | No | No | No | No | No | No | No | No | No | No |  |  |
| Technical                  | Does device meet all minimal performance characteristics from TPP?                                                                                                                                        | Verified by lab evaluations on n = 2 devices by 3 unique users  |      |      |                       |     |    |    |    |    |    |    |    |    |    |    |    |    |    |    |  |  |
| Environmental              | Is device rugged, durable, easy to maintain and repair?                                                                                                                                                   | Heat                                                            |      |      |                       |     |    |    |    |    |    |    |    |    |    |    |    |    |    |    |  |  |
|                            |                                                                                                                                                                                                           | Humidity                                                        |      |      |                       |     |    |    |    |    |    |    |    |    |    |    |    |    |    |    |  |  |
|                            |                                                                                                                                                                                                           | Dust                                                            |      |      |                       |     |    |    |    |    |    |    |    |    |    |    |    |    |    |    |  |  |
|                            |                                                                                                                                                                                                           | Power                                                           |      |      |                       |     |    |    |    |    |    |    |    |    |    |    |    |    |    |    |  |  |
| Usability                  | Can doctors and nurses use the device with minimal training?                                                                                                                                              | Heuristic Evaluation                                            |      |      |                       |     |    |    |    |    |    |    |    |    |    |    |    |    |    |    |  |  |
|                            |                                                                                                                                                                                                           | Houston task effectiveness (Setup)                              | 83%  | 100% | not included in evals |     |    |    |    |    |    |    |    |    |    |    |    |    |    |    |  |  |
|                            |                                                                                                                                                                                                           | Houston task effectiveness (Titration)                          | 100% | 66%  |                       |     |    |    |    |    |    |    |    |    |    |    |    |    |    |    |  |  |
|                            |                                                                                                                                                                                                           | Houston task effectiveness (Hat/prong)                          | 50%  | 100% |                       |     |    |    |    |    |    |    |    |    |    |    |    |    |    |    |  |  |
|                            |                                                                                                                                                                                                           | Houston SUS <50 50-70 >70                                       | 48   | 58   |                       |     |    |    |    |    |    |    |    |    |    |    |    |    |    |    |  |  |
|                            |                                                                                                                                                                                                           | Fraction of Houston users indicating preferred device           | 50%  | 50%  |                       |     |    |    |    |    |    |    |    |    |    |    |    |    |    |    |  |  |
|                            |                                                                                                                                                                                                           | Malawi task effectiveness (Setup)                               | 50%  | 50%  |                       | 0%  |    |    |    |    |    |    |    |    |    |    |    |    |    |    |  |  |
|                            |                                                                                                                                                                                                           | Malawi task effectiveness (Titration)                           | 0%   | 25%  |                       | 0%  |    |    |    |    |    |    |    |    |    |    |    |    |    |    |  |  |
|                            |                                                                                                                                                                                                           | Malawi task effectiveness (Hat/prong)                           | 25%  | 75%  |                       | 75% |    |    |    |    |    |    |    |    |    |    |    |    |    |    |  |  |
|                            |                                                                                                                                                                                                           | Fraction of Malawi users indicating preferred device            | 25%  | 75%  |                       | 0%  |    |    |    |    |    |    |    |    |    |    |    |    |    |    |  |  |
| Malawi SUS <50 50-70 >70   | 71                                                                                                                                                                                                        | 74                                                              | 29   |      |                       |     |    |    |    |    |    |    |    |    |    |    |    |    |    |    |  |  |
| NEST Qualified Technology? |                                                                                                                                                                                                           |                                                                 | Yes  | Yes  | No                    | No  | No | No | No | No | No | No | No | No | No | No | No | No | No | No |  |  |

Did not meet required specifications when evaluated against the TPP

Optimal Minimal Does not meet minimal Unknown

**Flow Splitter**

Evaluated against Target Product Profile (TPP) as reported by manufacturer

| TPP Characteristic                                   | Optimal Requirement                                                                                                                                     | Minimal Requirement                                            | A            | B    | C            | D                                                                   |
|------------------------------------------------------|---------------------------------------------------------------------------------------------------------------------------------------------------------|----------------------------------------------------------------|--------------|------|--------------|---------------------------------------------------------------------|
| Intended Use                                         | To allow multiple patients to receive individually adjusted flow rates from a single source of oxygen                                                   |                                                                |              |      |              |                                                                     |
| Target Operator                                      | For use in low- and middle-income countries by a wide variety of clinicians, including nurses, clinical officers, and pediatricians                     |                                                                |              |      |              |                                                                     |
| Target Population                                    | Neonates (born at any gestational age and require ongoing care)                                                                                         |                                                                |              |      |              |                                                                     |
| Target Setting                                       | Hospitals in low-resource settings, but, may be used in health facilities based on country guidelines                                                   | Hospitals in low-resource settings                             |              |      |              |                                                                     |
| Quality Management                                   | ISO 13485:2016 Medical devices - Quality management systems - Requirements for regulatory purposes                                                      |                                                                |              |      |              |                                                                     |
| Regulation                                           | At least one of: CE marking, approved by US FDA or another stringent regulatory body of a founding member of IMDRF (e.g., Japan or Australia or Canada) |                                                                |              |      |              |                                                                     |
| Air Flow per Patient                                 | 0-2 L/min                                                                                                                                               |                                                                |              |      |              |                                                                     |
| Flow Control                                         | Each patient has individually controlled flow rate                                                                                                      |                                                                |              |      |              |                                                                     |
| Number of Outputs                                    | 5                                                                                                                                                       | 2                                                              |              |      |              |                                                                     |
| Indication                                           | Each flow rate has a visual indicator                                                                                                                   |                                                                |              |      |              |                                                                     |
| Instrument Pricing                                   | <\$100 ex-works                                                                                                                                         | <\$600 ex-works                                                |              |      |              |                                                                     |
| Maintenance                                          | No/minimal maintenance                                                                                                                                  |                                                                |              |      |              |                                                                     |
| Purchased for evaluations?                           |                                                                                                                                                         |                                                                | Yes          | Yes  | Yes          | No                                                                  |
| Technical                                            | Does device meet all minimal performance characteristics from TPP?                                                                                      | Verified by lab evaluations on n = 2 devices by 3 unique users |              |      |              | Did not meet required specifications when evaluated against the TPP |
| Environmental                                        | Is device rugged, durable, easy to maintain and repair?                                                                                                 | Heat                                                           |              |      |              |                                                                     |
|                                                      |                                                                                                                                                         | Humidity                                                       |              |      |              |                                                                     |
|                                                      |                                                                                                                                                         | Dust                                                           |              |      |              |                                                                     |
|                                                      |                                                                                                                                                         | Power                                                          | N/A          | N/A  | N/A          |                                                                     |
| Usability                                            | Can doctors and nurses use the device with minimal training?                                                                                            | Heuristic Evaluation                                           |              |      |              |                                                                     |
|                                                      |                                                                                                                                                         | Houston task effectiveness                                     | 80%          | 100% | Did not test |                                                                     |
|                                                      |                                                                                                                                                         | Houston SUS<br><50 50-70 >70                                   | 58           | 76   |              |                                                                     |
|                                                      |                                                                                                                                                         | Fraction of Houston users indicating preferred device          | 0%           | 100% |              |                                                                     |
|                                                      |                                                                                                                                                         | Malawi task effectiveness                                      | Did not test |      |              |                                                                     |
|                                                      |                                                                                                                                                         | Malawi SUS<br><50 50-70 >70                                    |              |      |              |                                                                     |
| Fraction of Malawi users indicating preferred device |                                                                                                                                                         |                                                                |              |      |              |                                                                     |
| NEST Qualified Technology?                           |                                                                                                                                                         |                                                                | Yes          | Yes  | Yes          | No                                                                  |





Optimal Minimal Does not meet minimal Unknown

**Pulse Oximeter**

Evaluated against Target Product Profile (TPP) as reported by manufacturer

| TPP Characteristic                                   | Optimal Requirement                                                                                                                                                                                            | Minimal Requirement                                                                                                                                     | A            | B    | C   | D                                              | E   | F  | G  | H  | I  | J  | K  | L  | M  | N  | O  | P  | Q  | R  | S  | T  | U  | V  | W  | X  | Y  |  |  |
|------------------------------------------------------|----------------------------------------------------------------------------------------------------------------------------------------------------------------------------------------------------------------|---------------------------------------------------------------------------------------------------------------------------------------------------------|--------------|------|-----|------------------------------------------------|-----|----|----|----|----|----|----|----|----|----|----|----|----|----|----|----|----|----|----|----|----|--|--|
| Intended Use                                         | To continuously monitor oxygen saturation (SpO2) and pulse rate (PR) for neonatal patients                                                                                                                     | For use in low- and middle-income countries by a wide variety of clinicians, including nurses, clinical officers, and pediatricians                     |              |      |     |                                                |     |    |    |    |    |    |    |    |    |    |    |    |    |    |    |    |    |    |    |    |    |  |  |
| Target Operator                                      | For use in low- and middle-income countries by a wide variety of clinicians, including nurses, clinical officers, and pediatricians                                                                            | Neonates (born at any gestational age and require ongoing care)                                                                                         |              |      |     |                                                |     |    |    |    |    |    |    |    |    |    |    |    |    |    |    |    |    |    |    |    |    |  |  |
| Target Setting                                       | Hospitals in low-resource settings, but, may be used in health facilities based on country                                                                                                                     | Hospitals in low-resource settings                                                                                                                      |              |      |     |                                                |     |    |    |    |    |    |    |    |    |    |    |    |    |    |    |    |    |    |    |    |    |  |  |
| Quality Management                                   | ISO 13485:2016 Medical devices - Quality management systems -- Requirements for regulatory purposes                                                                                                            | At least one of: CE marking, approved by US FDA or another stringent regulatory body of a founding member of IMDRF (e.g., Japan or Australia or Canada) |              |      |     |                                                |     |    |    |    |    |    |    |    |    |    |    |    |    |    |    |    |    |    |    |    |    |  |  |
| Regulation                                           | At least one of: CE marking, approved by US FDA or another stringent regulatory body of a founding member of IMDRF (e.g., Japan or Australia or Canada)                                                        |                                                                                                                                                         |              |      |     |                                                |     |    |    |    |    |    |    |    |    |    |    |    |    |    |    |    |    |    |    |    |    |  |  |
| Pulse rate                                           | 25-250 bpm                                                                                                                                                                                                     | 30-240 bpm                                                                                                                                              |              |      |     |                                                |     |    |    |    |    |    |    |    |    |    |    |    |    |    |    |    |    |    |    |    |    |  |  |
| Pulse rate accuracy                                  | +/-3 bpm                                                                                                                                                                                                       |                                                                                                                                                         |              |      |     |                                                |     |    |    |    |    |    |    |    |    |    |    |    |    |    |    |    |    |    |    |    |    |  |  |
| Pulse rate resolution                                | 1 bpm                                                                                                                                                                                                          |                                                                                                                                                         |              |      |     |                                                |     |    |    |    |    |    |    |    |    |    |    |    |    |    |    |    |    |    |    |    |    |  |  |
| SPO2 accuracy                                        | +2%                                                                                                                                                                                                            | +3%                                                                                                                                                     |              |      |     |                                                |     |    |    |    |    |    |    |    |    |    |    |    |    |    |    |    |    |    |    |    |    |  |  |
| SPO2 range                                           | 0-100%                                                                                                                                                                                                         | 70-100%                                                                                                                                                 |              |      |     |                                                |     |    |    |    |    |    |    |    |    |    |    |    |    |    |    |    |    |    |    |    |    |  |  |
| Alarm characteristics                                | Visual and auditory                                                                                                                                                                                            | Auditory                                                                                                                                                |              |      |     |                                                |     |    |    |    |    |    |    |    |    |    |    |    |    |    |    |    |    |    |    |    |    |  |  |
| Alarm limits - PR                                    | Adjustable                                                                                                                                                                                                     | 80-180 bpm OR 100-180 bpm                                                                                                                               |              |      |     |                                                |     |    |    |    |    |    |    |    |    |    |    |    |    |    |    |    |    |    |    |    |    |  |  |
| Alarm limits - SpO2                                  | Adjustable                                                                                                                                                                                                     |                                                                                                                                                         |              |      |     |                                                |     |    |    |    |    |    |    |    |    |    |    |    |    |    |    |    |    |    |    |    |    |  |  |
| Continuous measurement                               | Yes                                                                                                                                                                                                            |                                                                                                                                                         |              |      |     |                                                |     |    |    |    |    |    |    |    |    |    |    |    |    |    |    |    |    |    |    |    |    |  |  |
| Patient interface                                    | Neonate specific, biocompatible and reusable.                                                                                                                                                                  |                                                                                                                                                         |              |      |     |                                                |     |    |    |    |    |    |    |    |    |    |    |    |    |    |    |    |    |    |    |    |    |  |  |
| Size                                                 | Easily moveable, not pocketable, can be secured                                                                                                                                                                | Handheld with dock                                                                                                                                      |              |      |     |                                                |     |    |    |    |    |    |    |    |    |    |    |    |    |    |    |    |    |    |    |    |    |  |  |
| Weight                                               | <500 g, portable                                                                                                                                                                                               |                                                                                                                                                         |              |      |     |                                                |     |    |    |    |    |    |    |    |    |    |    |    |    |    |    |    |    |    |    |    |    |  |  |
| Consumables                                          | >12 months before required                                                                                                                                                                                     | >6 months before required with 2 neonatal probes included in package                                                                                    |              |      |     |                                                |     |    |    |    |    |    |    |    |    |    |    |    |    |    |    |    |    |    |    |    |    |  |  |
| Instrument Pricing                                   | < \$150 ex-works                                                                                                                                                                                               | < \$250 ex-works                                                                                                                                        |              |      |     |                                                |     |    |    |    |    |    |    |    |    |    |    |    |    |    |    |    |    |    |    |    |    |  |  |
| Consumable Pricing                                   | < \$50/year ex-works (two probes)                                                                                                                                                                              | < \$80 per year ex-works (two probes)                                                                                                                   |              |      |     |                                                |     |    |    |    |    |    |    |    |    |    |    |    |    |    |    |    |    |    |    |    |    |  |  |
| Power Source                                         | Mains with rechargeable battery                                                                                                                                                                                |                                                                                                                                                         |              |      |     |                                                |     |    |    |    |    |    |    |    |    |    |    |    |    |    |    |    |    |    |    |    |    |  |  |
| Battery                                              | Rechargeable battery, >24hr on single charge                                                                                                                                                                   | Rechargeable battery, >6hr on single charge                                                                                                             |              |      |     |                                                |     |    |    |    |    |    |    |    |    |    |    |    |    |    |    |    |    |    |    |    |    |  |  |
| Voltage                                              | None                                                                                                                                                                                                           | Model must match the voltage and frequency of the purchasing country's local power grid (e.g., 110-120 VAC at 60 Hz or 220-240 VAC at 50 Hz)            |              |      |     |                                                |     |    |    |    |    |    |    |    |    |    |    |    |    |    |    |    |    |    |    |    |    |  |  |
| User instructions                                    | User manual and additional training materials (checklists, videos, guides) in at least one national official language for the country intended use. Attached to device with labels and markings where possible | User manual provided in at least one national official language                                                                                         |              |      |     |                                                |     |    |    |    |    |    |    |    |    |    |    |    |    |    |    |    |    |    |    |    |    |  |  |
| Training Required                                    | Minimal                                                                                                                                                                                                        |                                                                                                                                                         |              |      |     |                                                |     |    |    |    |    |    |    |    |    |    |    |    |    |    |    |    |    |    |    |    |    |  |  |
| Warranty                                             | 5 years                                                                                                                                                                                                        | 1 year                                                                                                                                                  |              |      |     |                                                |     |    |    |    |    |    |    |    |    |    |    |    |    |    |    |    |    |    |    |    |    |  |  |
| Decontamination                                      | Easy to clean with common disinfection agents                                                                                                                                                                  |                                                                                                                                                         |              |      |     |                                                |     |    |    |    |    |    |    |    |    |    |    |    |    |    |    |    |    |    |    |    |    |  |  |
| Usage Meter                                          | Digitally stored record displaying cumulative hours of operation                                                                                                                                               | Digitally stored record displaying 50 previous readings or >50 hours                                                                                    |              |      |     |                                                |     |    |    |    |    |    |    |    |    |    |    |    |    |    |    |    |    |    |    |    |    |  |  |
|                                                      |                                                                                                                                                                                                                | Purchased for evaluations?                                                                                                                              | Yes          | Yes  | Yes | Yes                                            | Yes | No | No | No | No | No | No | No | No | No | No | No | No | No | No | No | No | No | No | No | No |  |  |
| Technical                                            | Does device meet all minimal performance characteristics from TPP?                                                                                                                                             | Verified by lab evaluations on n = 2 devices by 3 unique users                                                                                          |              |      |     |                                                |     |    |    |    |    |    |    |    |    |    |    |    |    |    |    |    |    |    |    |    |    |  |  |
| Environmental                                        | Is device rugged, durable, easy to maintain and repair?                                                                                                                                                        | Heat                                                                                                                                                    |              |      |     |                                                |     |    |    |    |    |    |    |    |    |    |    |    |    |    |    |    |    |    |    |    |    |  |  |
|                                                      |                                                                                                                                                                                                                | Humidity                                                                                                                                                |              |      |     |                                                |     |    |    |    |    |    |    |    |    |    |    |    |    |    |    |    |    |    |    |    |    |  |  |
| Usability                                            | Can doctors and nurses use the device with minimal training?                                                                                                                                                   | Dust                                                                                                                                                    | Did not test |      |     |                                                |     |    |    |    |    |    |    |    |    |    |    |    |    |    |    |    |    |    |    |    |    |  |  |
|                                                      |                                                                                                                                                                                                                | Power                                                                                                                                                   |              |      |     |                                                |     |    |    |    |    |    |    |    |    |    |    |    |    |    |    |    |    |    |    |    |    |  |  |
|                                                      |                                                                                                                                                                                                                | Heuristic Evaluation                                                                                                                                    |              |      |     |                                                |     |    |    |    |    |    |    |    |    |    |    |    |    |    |    |    |    |    |    |    |    |  |  |
|                                                      |                                                                                                                                                                                                                | Houston task effectiveness (Setup/report)                                                                                                               | 83%          | 100% | 83% | Failed initial heuristics with LMIC clinicians |     |    |    |    |    |    |    |    |    |    |    |    |    |    |    |    |    |    |    |    |    |  |  |
|                                                      |                                                                                                                                                                                                                | Houston task effectiveness (Alarm)                                                                                                                      | 100%         | 100% | 83% |                                                |     |    |    |    |    |    |    |    |    |    |    |    |    |    |    |    |    |    |    |    |    |  |  |
|                                                      |                                                                                                                                                                                                                | Houston SUS <50 >70 >70                                                                                                                                 | 82           | 90   | 45  |                                                |     |    |    |    |    |    |    |    |    |    |    |    |    |    |    |    |    |    |    |    |    |  |  |
|                                                      |                                                                                                                                                                                                                | Fraction of Houston users indicating preferred device                                                                                                   | 33%          | 67%  | 0%  |                                                |     |    |    |    |    |    |    |    |    |    |    |    |    |    |    |    |    |    |    |    |    |  |  |
|                                                      |                                                                                                                                                                                                                | Malawi task effectiveness (Setup/report)                                                                                                                | 83%          | 83%  | 58% |                                                |     |    |    |    |    |    |    |    |    |    |    |    |    |    |    |    |    |    |    |    |    |  |  |
| Malawi task effectiveness (Alarm)                    | 42%                                                                                                                                                                                                            | 42%                                                                                                                                                     | 8%           |      |     |                                                |     |    |    |    |    |    |    |    |    |    |    |    |    |    |    |    |    |    |    |    |    |  |  |
| Malawi SUS <50 >70 >70                               | 80                                                                                                                                                                                                             | 80                                                                                                                                                      | 52           |      |     |                                                |     |    |    |    |    |    |    |    |    |    |    |    |    |    |    |    |    |    |    |    |    |  |  |
| Fraction of Malawi users indicating preferred device | 42%                                                                                                                                                                                                            | 42%                                                                                                                                                     | 16%          |      |     |                                                |     |    |    |    |    |    |    |    |    |    |    |    |    |    |    |    |    |    |    |    |    |  |  |
| NEST Qualified Technology?                           |                                                                                                                                                                                                                |                                                                                                                                                         | Yes          | Yes  | No  | No                                             | No  | No | No | No | No | No | No | No | No | No | No | No | No | No | No | No | No | No | No | No |    |  |  |

Did not meet required specifications when evaluated against the TPP

Optimal Minimal Does not meet minimal Unknown

**Suction Pump**

Evaluated against Target Product Profile (TPP) as reported by manufacturer

| TPP Characteristic                                   | Optimal Requirement                                                                                                                                                                                                | Minimal Requirement                                             | A    | B    | C    | D  | E  | F  | G  |
|------------------------------------------------------|--------------------------------------------------------------------------------------------------------------------------------------------------------------------------------------------------------------------|-----------------------------------------------------------------|------|------|------|----|----|----|----|
| Intended Use                                         | Aspirations and removal of secretions, bodily fluids and foreign objects from a patient's airway or respiratory support system in the nasal, pharyngeal and                                                        |                                                                 |      |      |      |    |    |    |    |
| Target Operator                                      | For use in low- and middle-income countries by a wide variety of clinicians, including nurses, clinical officers, and pediatricians                                                                                |                                                                 |      |      |      |    |    |    |    |
| Target Population                                    | Neonates (born at any gestational age and require ongoing care)                                                                                                                                                    |                                                                 |      |      |      |    |    |    |    |
| Target Setting                                       | Hospitals in low-resource settings                                                                                                                                                                                 |                                                                 |      |      |      |    |    |    |    |
| Quality Management                                   | ISO 13485:2016 Medical devices - Quality management systems                                                                                                                                                        |                                                                 |      |      |      |    |    |    |    |
| Regulation                                           | At least one of: CE marking, approved by US FDA or another atrigent regulatory body of a founding member of IMDRF (e.g., Japan or Australia or Canada)                                                             |                                                                 |      |      |      |    |    |    |    |
| Pressure                                             | 60-120 mm Hg with continuous adjustment                                                                                                                                                                            |                                                                 |      |      |      |    |    |    |    |
| Bottle Capacity                                      | 1L                                                                                                                                                                                                                 |                                                                 |      |      |      |    |    |    |    |
| Noise Level                                          | As low as possible                                                                                                                                                                                                 |                                                                 |      |      |      |    |    |    |    |
| Cleaning                                             | Collection vessel easy to clean reusable                                                                                                                                                                           |                                                                 |      |      |      |    |    |    |    |
| Maintenance                                          | No maintenance or lubrication                                                                                                                                                                                      |                                                                 |      |      |      |    |    |    |    |
| Operation Mode                                       | Adjustable to neonatal setting (60-100 mm Hg)                                                                                                                                                                      |                                                                 |      |      |      |    |    |    |    |
| Instrument Pricing                                   | <\$100 ex-works                                                                                                                                                                                                    | <\$250 ex-works                                                 |      |      |      |    |    |    |    |
| Power Source                                         | Mains Power                                                                                                                                                                                                        |                                                                 |      |      |      |    |    |    |    |
| Voltage                                              | Model must match the voltage and frequency of the purchasing country's local power grid (e.g., 110-120 VAC at 60 Hz or 220-240 VAC at 50 Hz)                                                                       |                                                                 |      |      |      |    |    |    |    |
| User instructions                                    | User manual and additional training materials (checklists, videos, guides) in at least one national official language for the country of intended use. Attached to device with labels and markings where possible. | User manual provided in at least one national official language |      |      |      |    |    |    |    |
| Warranty                                             | 5 years                                                                                                                                                                                                            |                                                                 |      |      |      |    |    |    |    |
| Purchased for evaluations?                           |                                                                                                                                                                                                                    |                                                                 | Yes  | Yes  | Yes  | No | No | No | No |
| Technical                                            | Does device meet all minimal performance characteristics from TPP?                                                                                                                                                 | Verified by lab evaluations on n = 2 devices by 3 unique users  |      |      |      |    |    |    |    |
| Environmental                                        | Is device rugged, durable, easy to maintain and repair?                                                                                                                                                            | Heat                                                            |      |      |      |    |    |    |    |
|                                                      |                                                                                                                                                                                                                    | Humidity                                                        |      |      |      |    |    |    |    |
|                                                      |                                                                                                                                                                                                                    | Dust                                                            |      |      |      |    |    |    |    |
|                                                      |                                                                                                                                                                                                                    | Power                                                           |      |      |      |    |    |    |    |
| Usability                                            | Can doctors and nurses use the device with minimal training?                                                                                                                                                       | Heuristic Evaluation                                            |      |      |      |    |    |    |    |
|                                                      |                                                                                                                                                                                                                    | Houston task effectiveness (Setup)                              | 100% | 33%  | 100% |    |    |    |    |
|                                                      |                                                                                                                                                                                                                    | Houston task effectiveness (Use)                                | 100% | 100% | 100% |    |    |    |    |
|                                                      |                                                                                                                                                                                                                    | Houston SUS<br><50 50-70 >70                                    | 80   | 68   | 84   |    |    |    |    |
|                                                      |                                                                                                                                                                                                                    | Fraction of Houston users indicating preferred device           | 0%   | 0%   | 100% |    |    |    |    |
|                                                      |                                                                                                                                                                                                                    | Malawi task effectiveness (Setup)                               | 75%  | 50%  |      |    |    |    |    |
|                                                      |                                                                                                                                                                                                                    | Malawi task effectiveness (Use)                                 | 100% | 100% |      |    |    |    |    |
|                                                      |                                                                                                                                                                                                                    | Malawi SUS<br><50 50-70 >70                                     | 85   | 85   |      |    |    |    |    |
| Fraction of Malawi users indicating preferred device | 50%                                                                                                                                                                                                                | 50%                                                             |      |      |      |    |    |    |    |
| NEST Qualified Technology?                           |                                                                                                                                                                                                                    |                                                                 | Yes  | No   | No   | No | No | No | No |

Did not meet required specifications when evaluated against the TPP
